# Supplementary material for: A new mesoporous Ce–Mn-LDH-based Co-MOF nano-composite for the green synthesis of tetrazoloquinazolines
Source: PubMed Central journal article supplement (PMC11668168; doi:10.1039/d4na00643g), 2024-11-21
Supplement: NA-OLF-D4NA00643G-s001.pdf [file NA-OLF-D4NA00643G-s001.pdf]

## Supporting Information

(Nanoscale Advances)

# A new mesoporous Ce-Mn-LDH-based Co-MOF nano-composite for the green synthesis of tetrazoloquinazolines

Samira Javadi, Davood Habibi\*

Department of Organic Chemistry, Faculty of Chemistry and Petroleum Sciences, Bu-Ali Sina University, Hamedan, Iran

\*Corresponding author email: davood.habibi@gmail.com (& dhabibi@basu.ac.ir), Tel: 98 81-38380922; Fax: 98 81-31408025

### CONTENT

#### PAGE

|                                      |    |
|--------------------------------------|----|
| IR Spectrum of (1a)                  | 2  |
| <sup>1</sup> HNMR Spectrum of (1a)   | 2  |
| <sup>13</sup> CNMR Spectrum of (1a)  | 3  |
| IR Spectrum of (2a)                  | 3  |
| <sup>1</sup> HNMR Spectrum of (2a)   | 4  |
| <sup>13</sup> CNMR Spectrum of (2a)  | 4  |
| IR Spectrum of (3a)                  | 5  |
| <sup>1</sup> HNMR Spectrum of (3a)   | 5  |
| <sup>13</sup> CNMR Spectrum of (3a)  | 6  |
| IR Spectrum of (4a)                  | 6  |
| <sup>1</sup> HNMR Spectrum of (4a)   | 7  |
| <sup>13</sup> CNMR Spectrum of (4a)  | 7  |
| IR Spectrum of (5a)                  | 8  |
| <sup>1</sup> HNMR Spectrum of (5a)   | 8  |
| <sup>13</sup> CNMR Spectrum of (5a)  | 9  |
| IR Spectrum of (6a)                  | 9  |
| <sup>1</sup> HNMR Spectrum of (6a)   | 10 |
| <sup>13</sup> CNMR Spectrum of (6a)  | 10 |
| IR Spectrum of (7a)                  | 11 |
| <sup>1</sup> HNMR Spectrum of (7a)   | 11 |
| <sup>13</sup> CNMR Spectrum of (7a)  | 12 |
| IR Spectrum of (8a)                  | 12 |
| <sup>1</sup> HNMR Spectrum of (8a)   | 13 |
| <sup>13</sup> CNMR Spectrum of (8a)  | 13 |
| IR Spectrum of (9a)                  | 14 |
| <sup>1</sup> HNMR Spectrum of (9a)   | 14 |
| <sup>13</sup> CNMR Spectrum of (9a)  | 15 |
| IR Spectrum of (10a)                 | 15 |
| <sup>1</sup> HNMR Spectrum of (10a)  | 16 |
| <sup>13</sup> CNMR Spectrum of (10a) | 16 |
| IR Spectrum of (11a)                 | 17 |
| IR Spectrum of (12a)                 | 17 |

Spectral data  
5-(2-methoxyphenyl)-4,5-dihydrobenzo[g]tetrazolo[1,5-*a*]quinazoline-6,11-dione (**1a**)

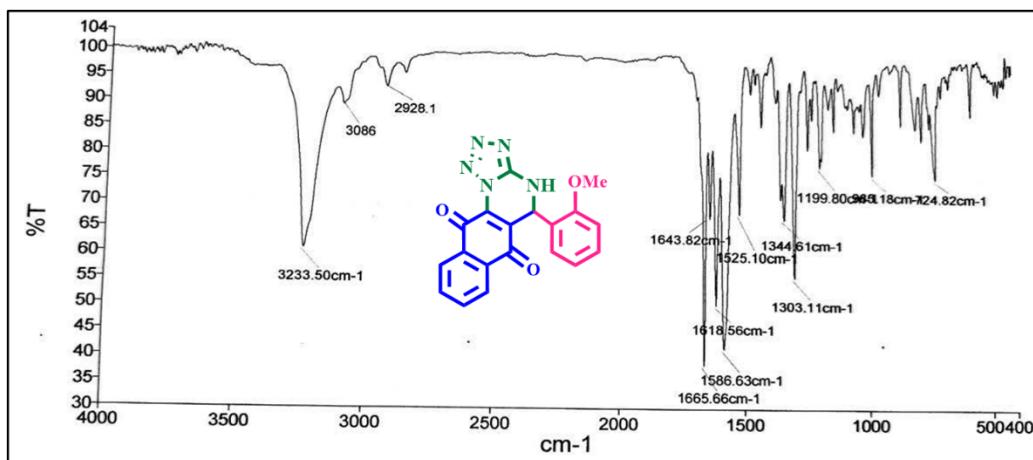

IR Spectrum of 1a

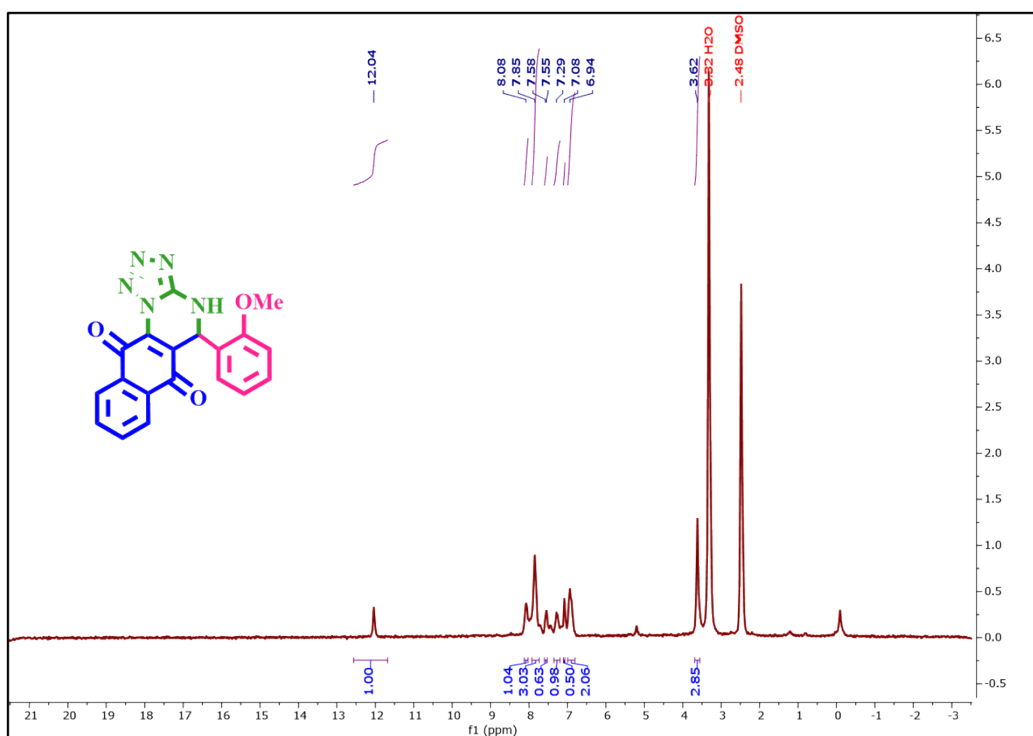

<sup>1</sup>H NMR Spectrum of 1a

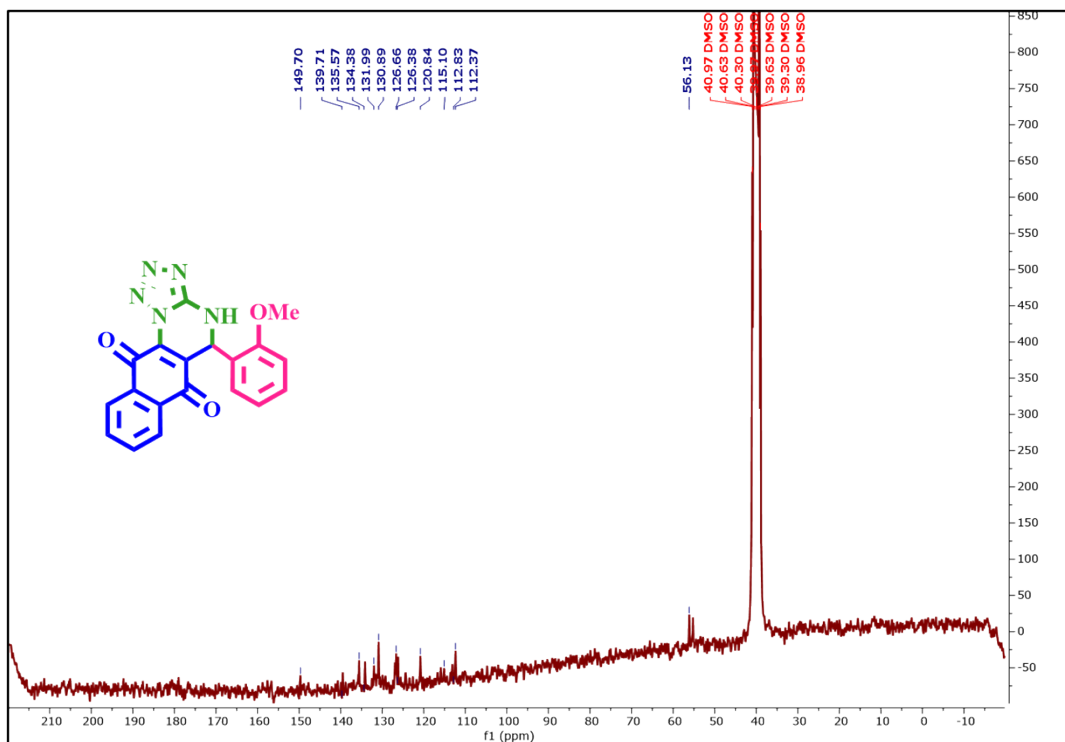

5-(4-(dimethylamino) phenyl)-4,5-dihydrobenzo[g]tetrazolo[1,5-a] quinazoline-6,11-dione (2a)

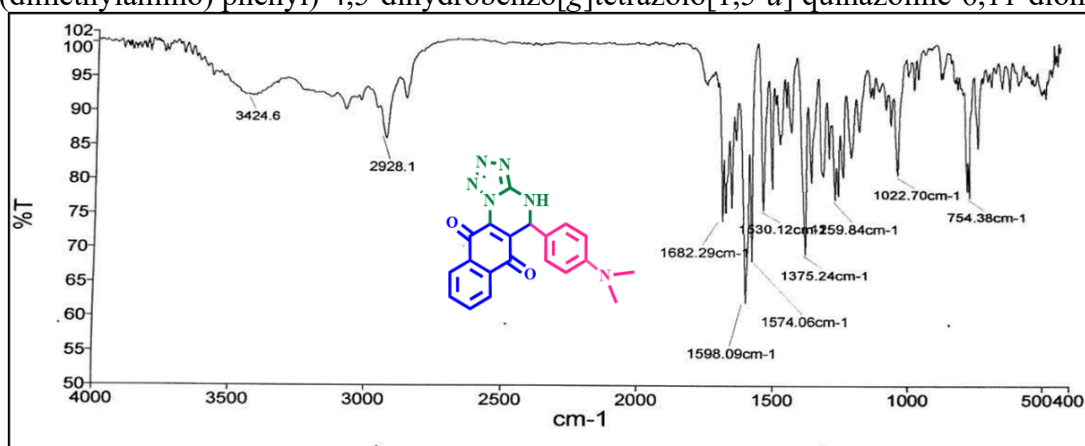

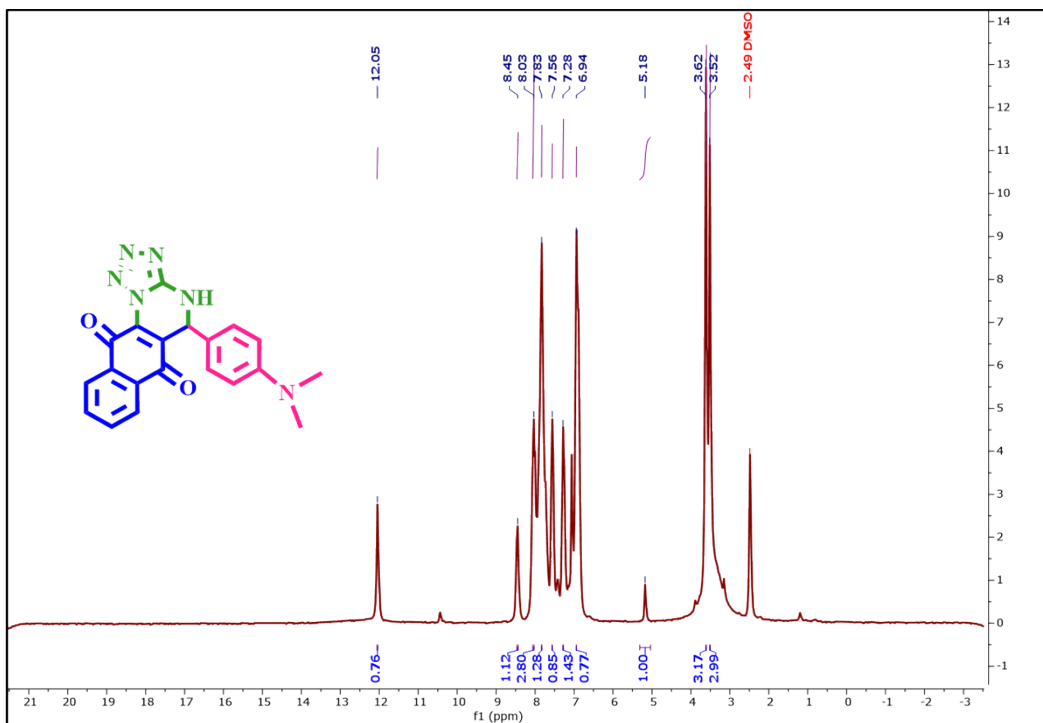

<sup>1</sup>H NMR Spectrum of 2a

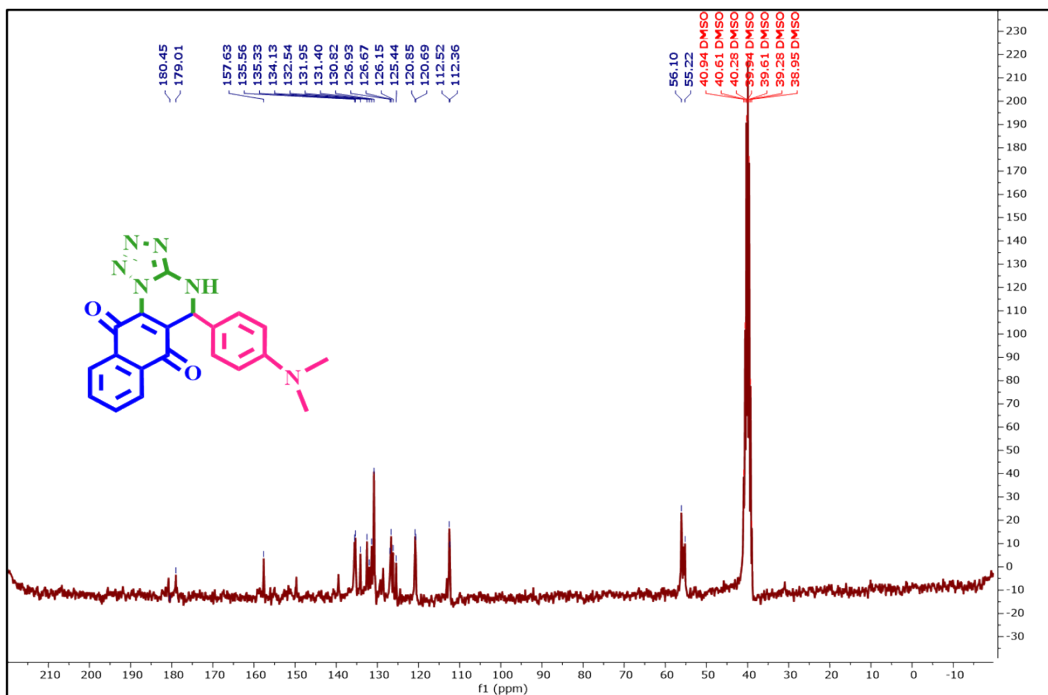

<sup>13</sup>C NMR Spectrum of 2a

5-(thiophen-2-yl)-4,5-dihydrobenzo[g]tetrazolo[1,5-a]quinazoline-6,11-dione (**3a**)

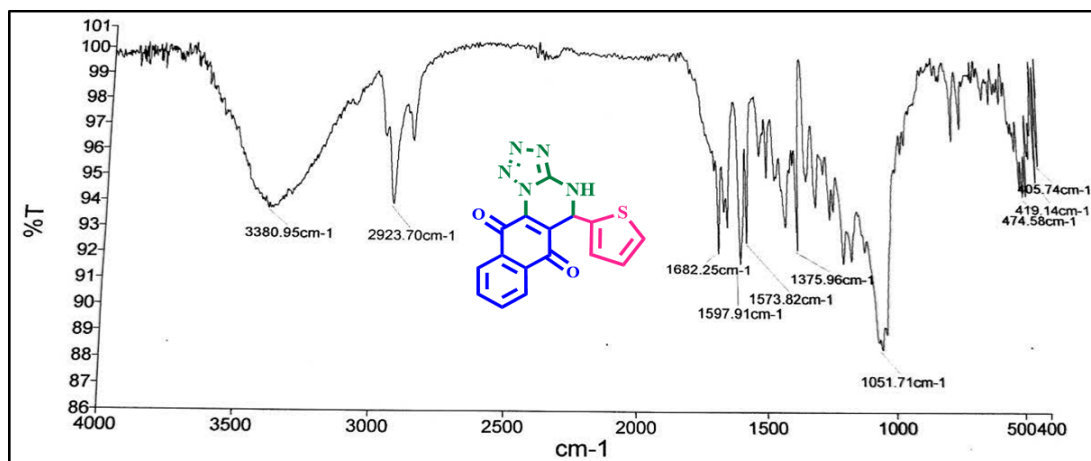

IR Spectrum of 3a

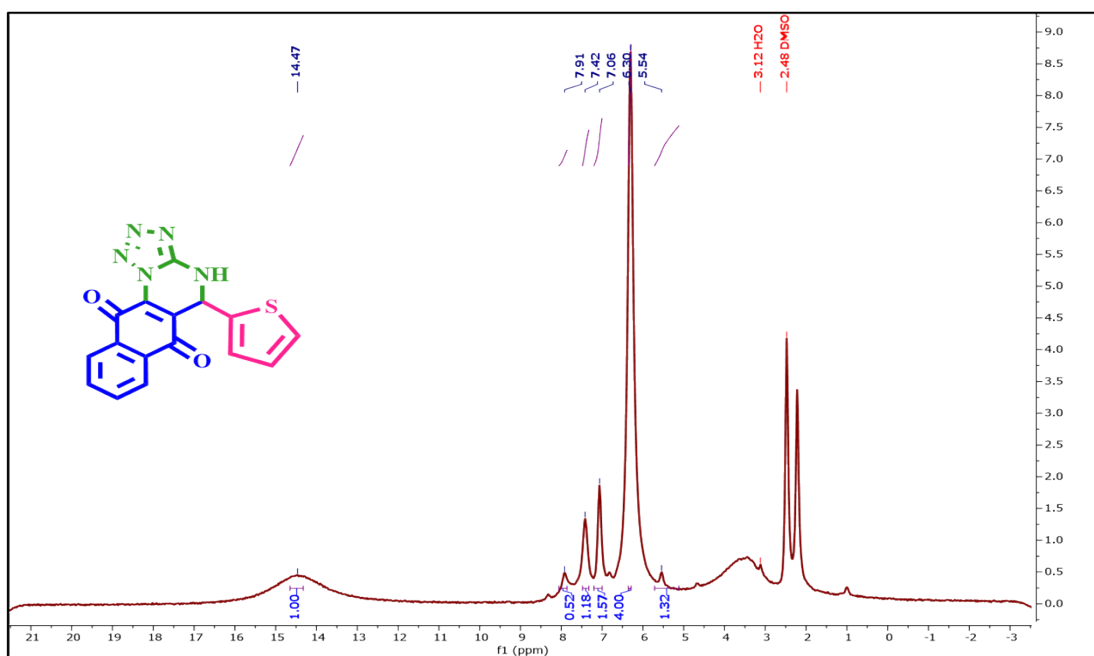

<sup>1</sup>H NMR Spectrum of 3a

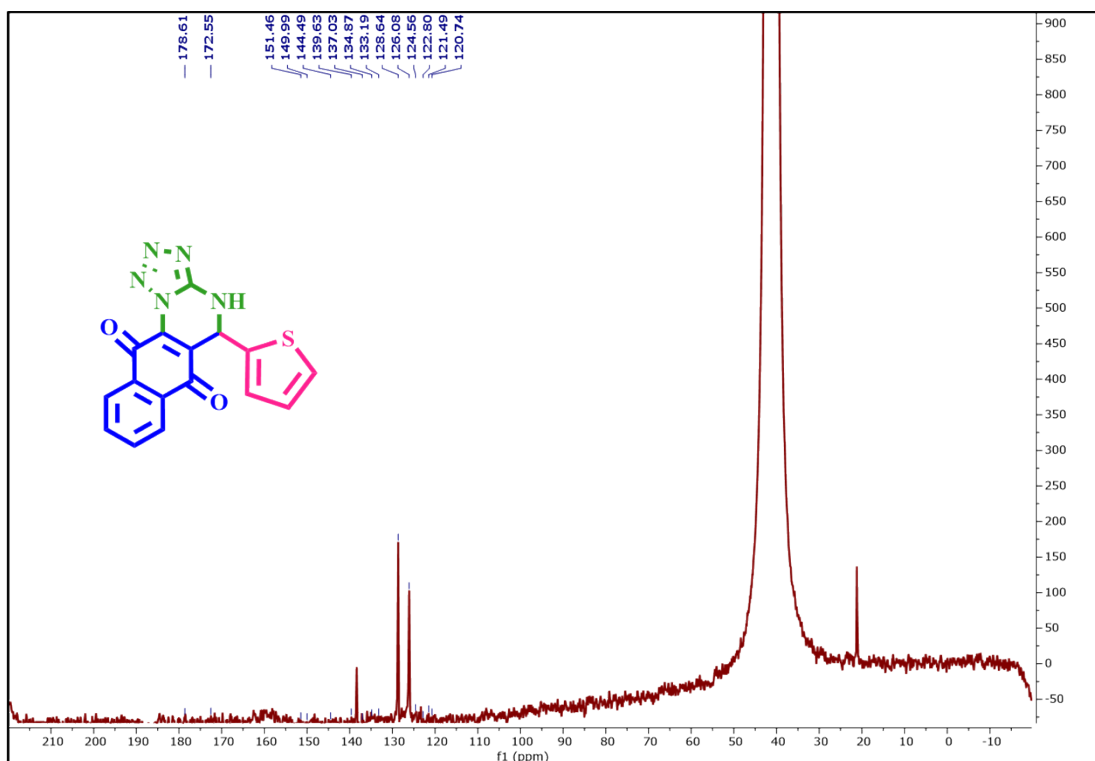

$^{13}\text{C}$ NMR Spectrum of 3a

5-(4-nitrophenyl)-4,5-dihydro-6*H*-chromeno[3,4-*e*]tetrazolo[1,5-*a*]pyrimidin-6-one (**4a**)

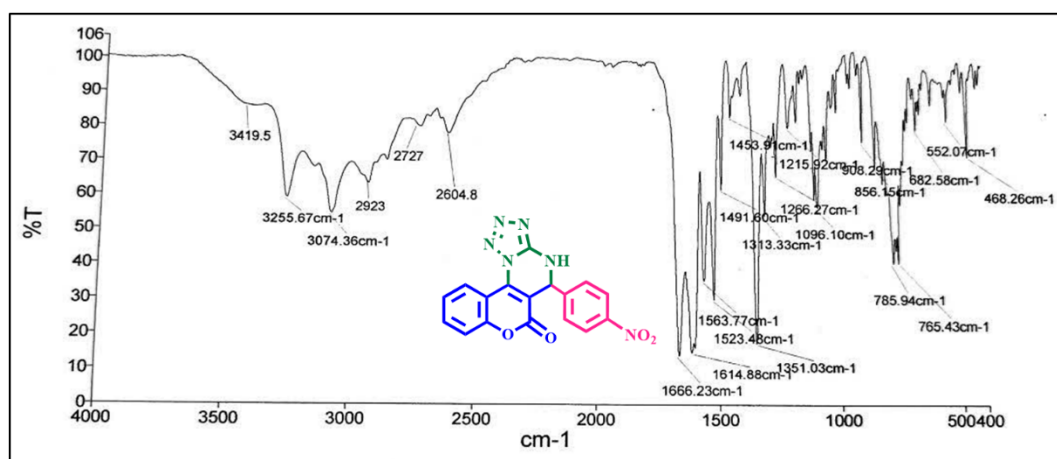

IR Spectrum of 4a

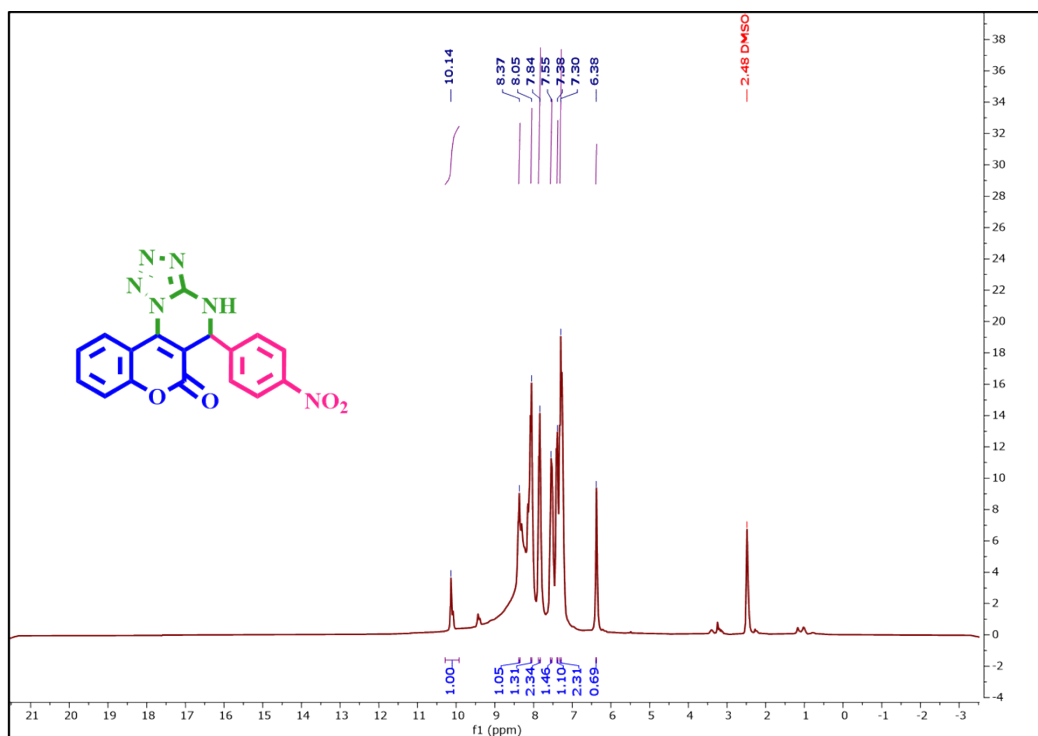

$^1\text{H NMR}$  Spectrum of 4a

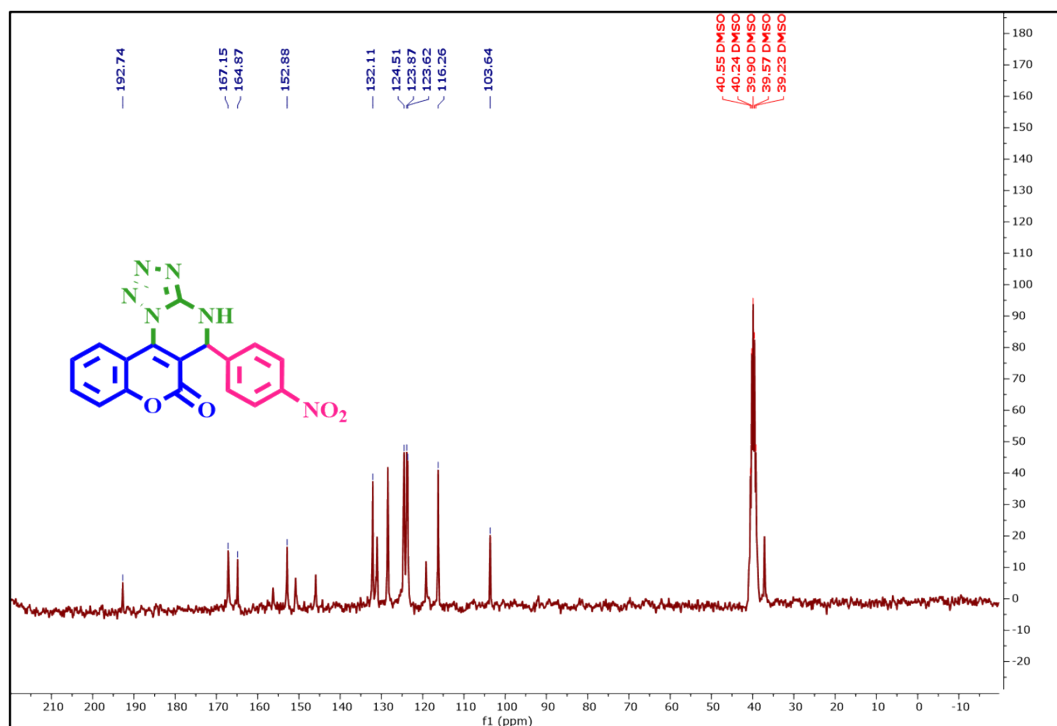

$^{13}\text{C NMR}$  Spectrum of 4a

5-(2,3-dihydroxyphenyl)-4,5-dihydro-6H-chromeno[3,4-e] tetrazolo[1,5-a] pyrimidin-6-one (**5a**)

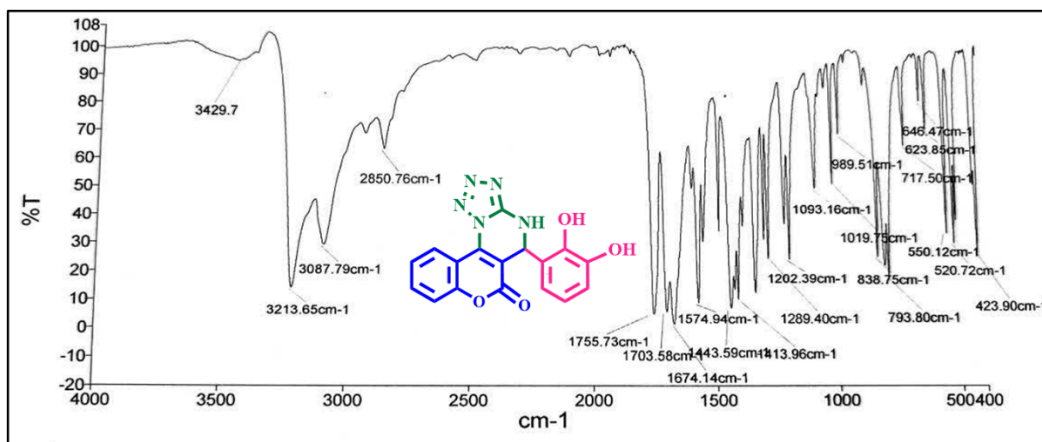

IR Spectrum of **5a**

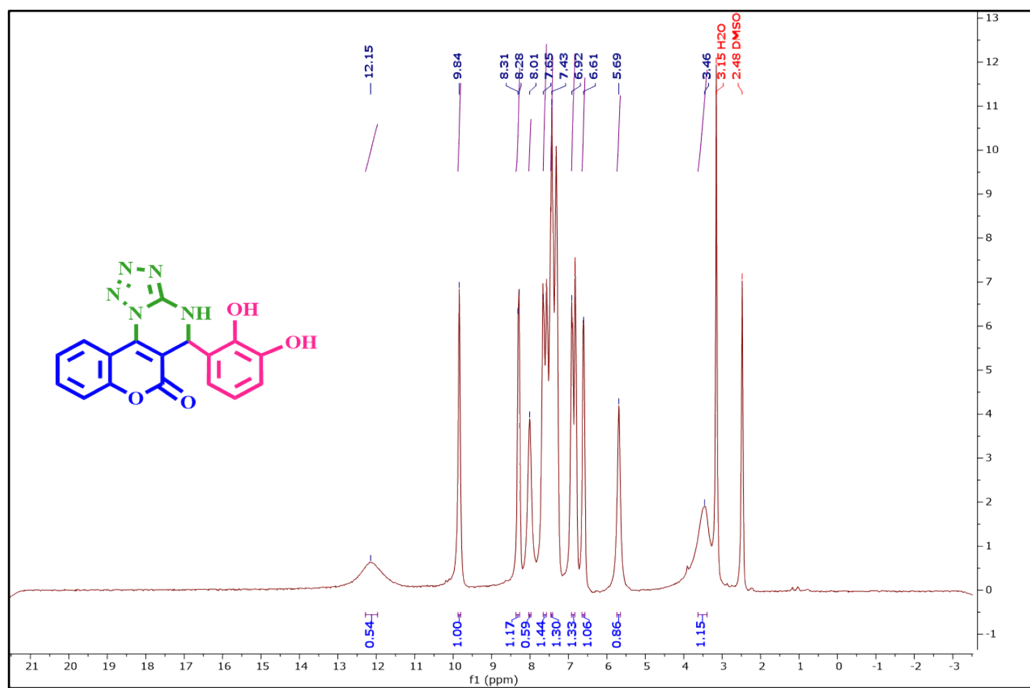

<sup>1</sup>H NMR Spectrum of **5a**



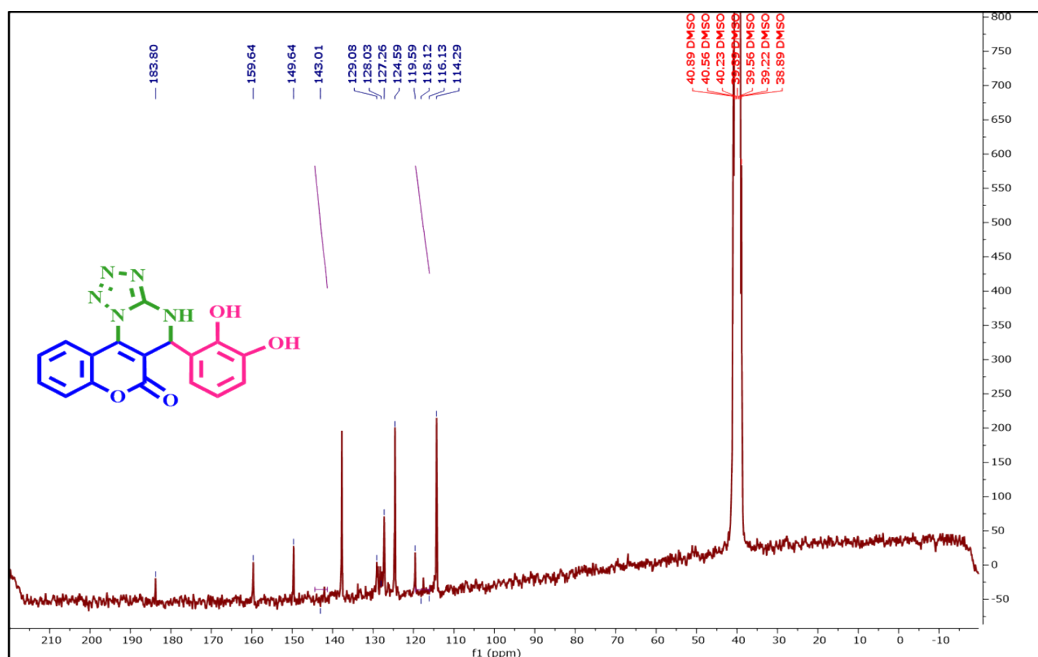

$^{13}\text{C}$ NMR Spectrum of 5a

5-(2,4-dichlorophenyl)-4,5-dihydro-6H-chromeno[3,4-e] tetrazolo[1,5-a] pyrimidin-6-one (**6a**)

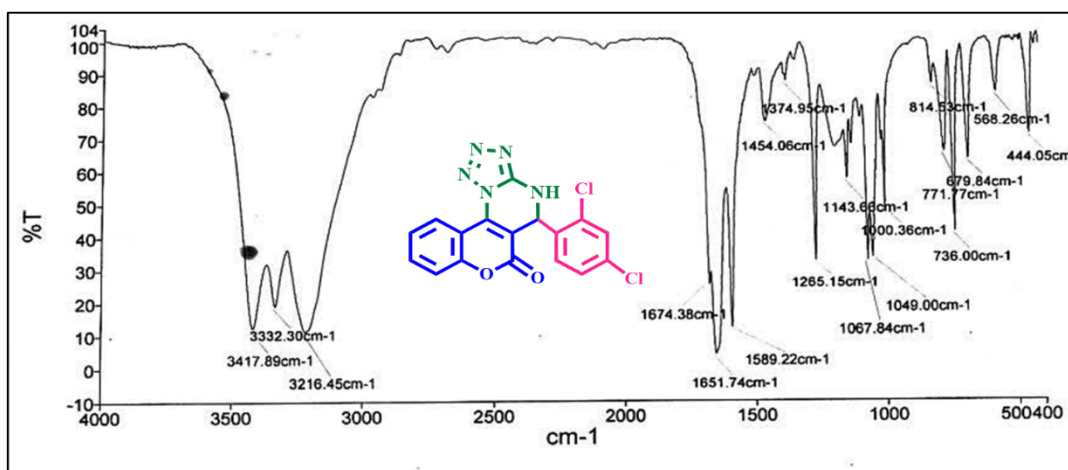

IR Spectrum of 6a

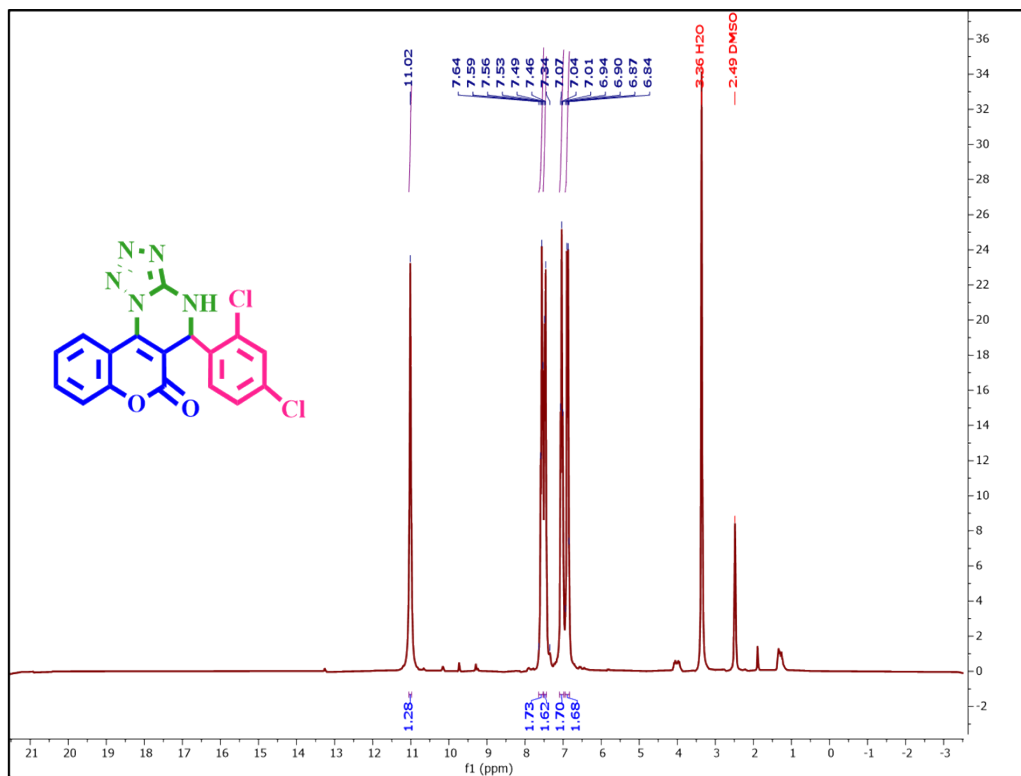

<sup>1</sup>H NMR Spectrum of 6a

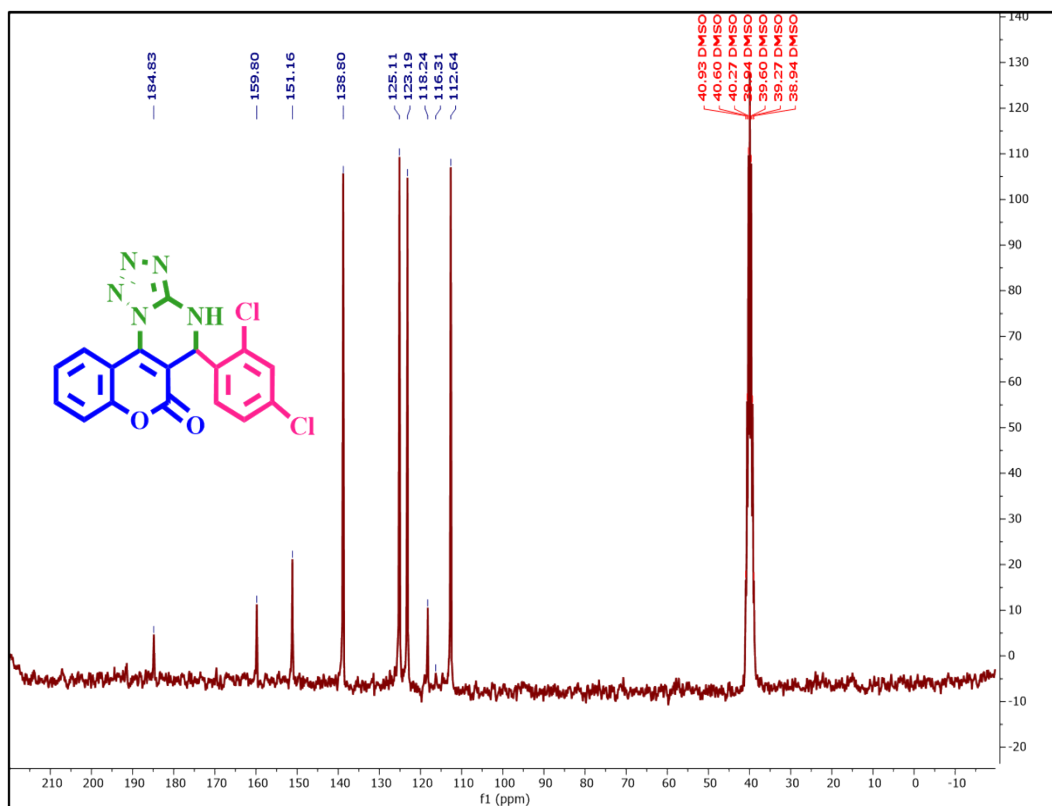

<sup>13</sup>C NMR Spectrum of 6a

5-(2-methoxyphenyl)-5,9-dihydropyrimido[5,4-*e*]tetrazolo[1,5-*a*]pyrimidine-6,8(4*H*,7*H*)-dione  
(7a)

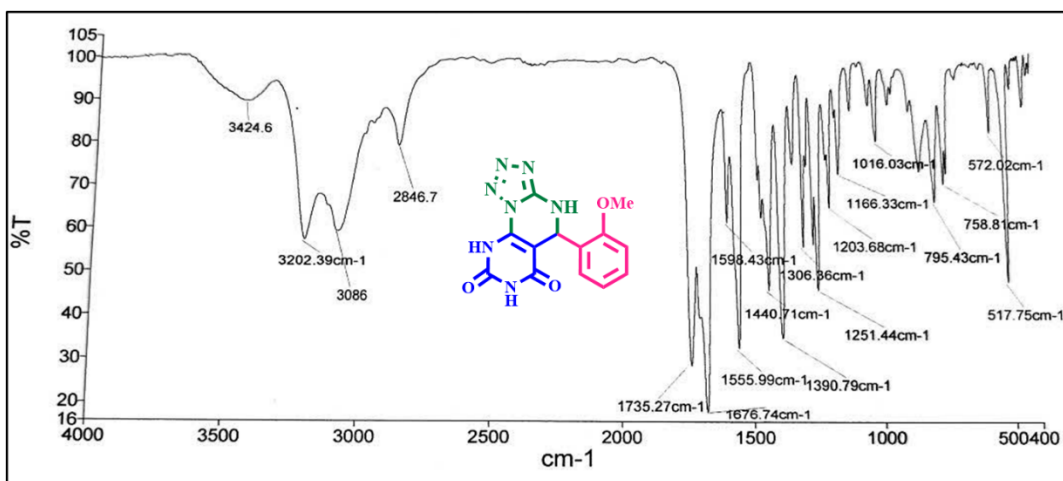

IR Spectrum of 7a

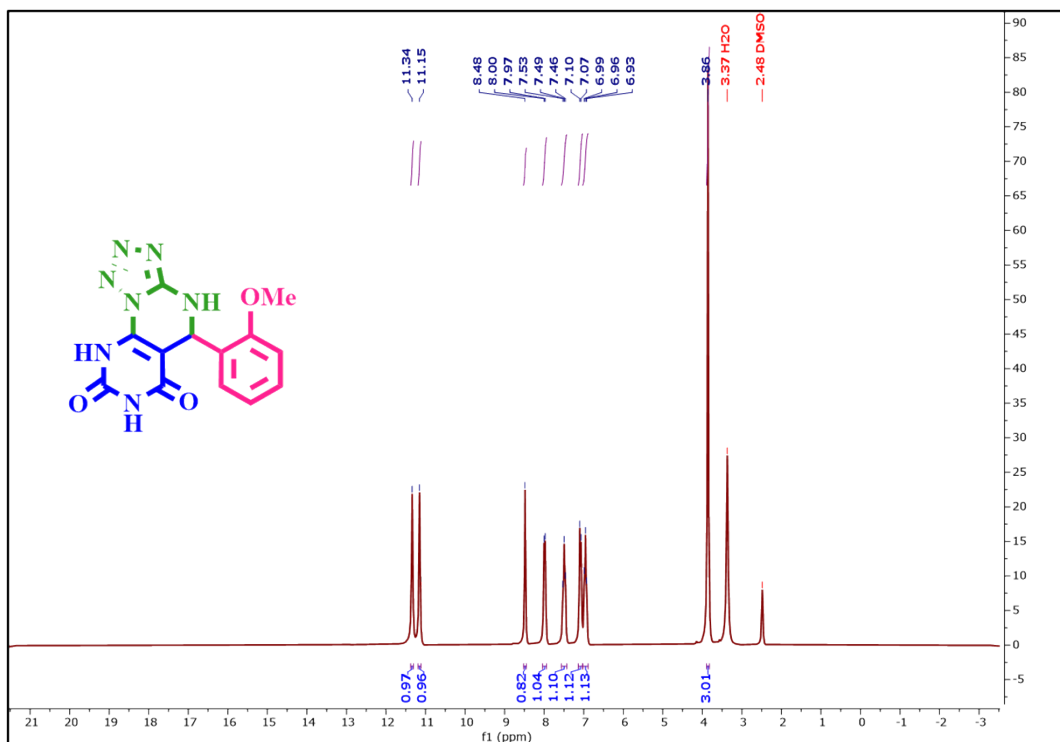

<sup>1</sup>H NMR Spectrum of 7a

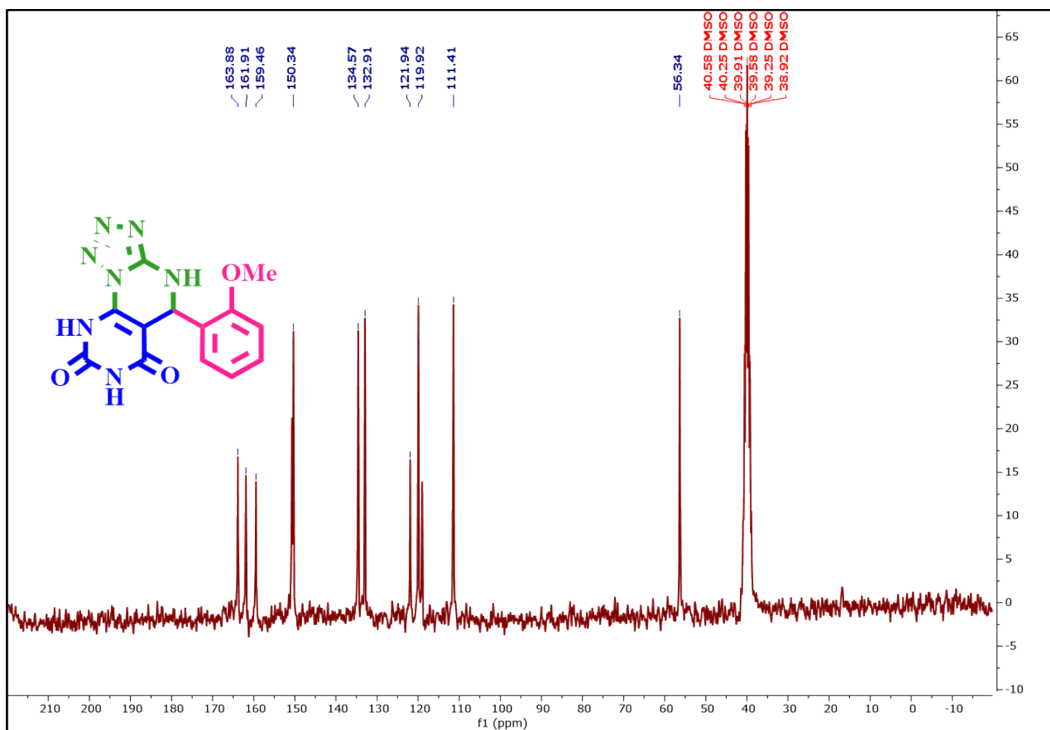

$^{13}\text{C}$ NMR Spectrum of 7a

5-(thiophen-2-yl)-5,9-dihydropyrimido[5,4-*e*] tetrazolo[1,5-*a*] pyrimidine-6,8(4*H*,7*H*)-dione (**8a**)

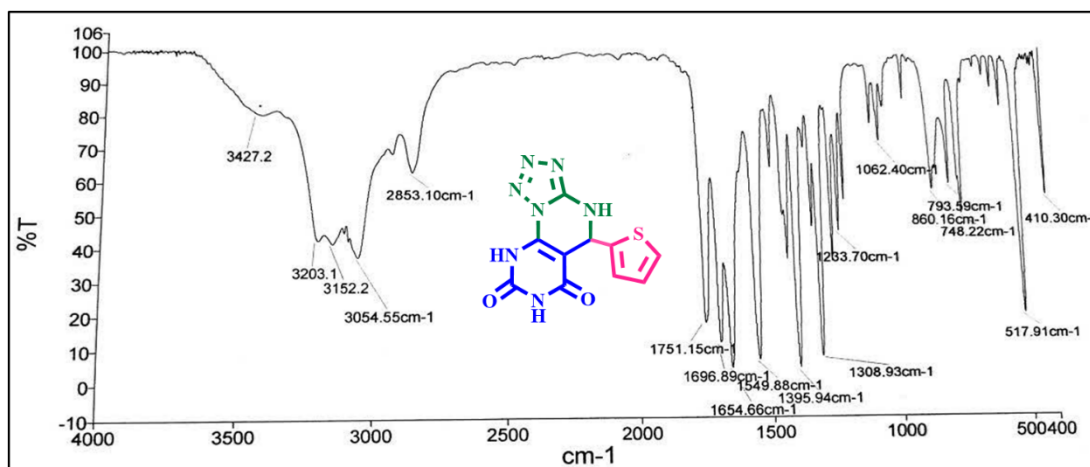

IR Spectrum of 8a

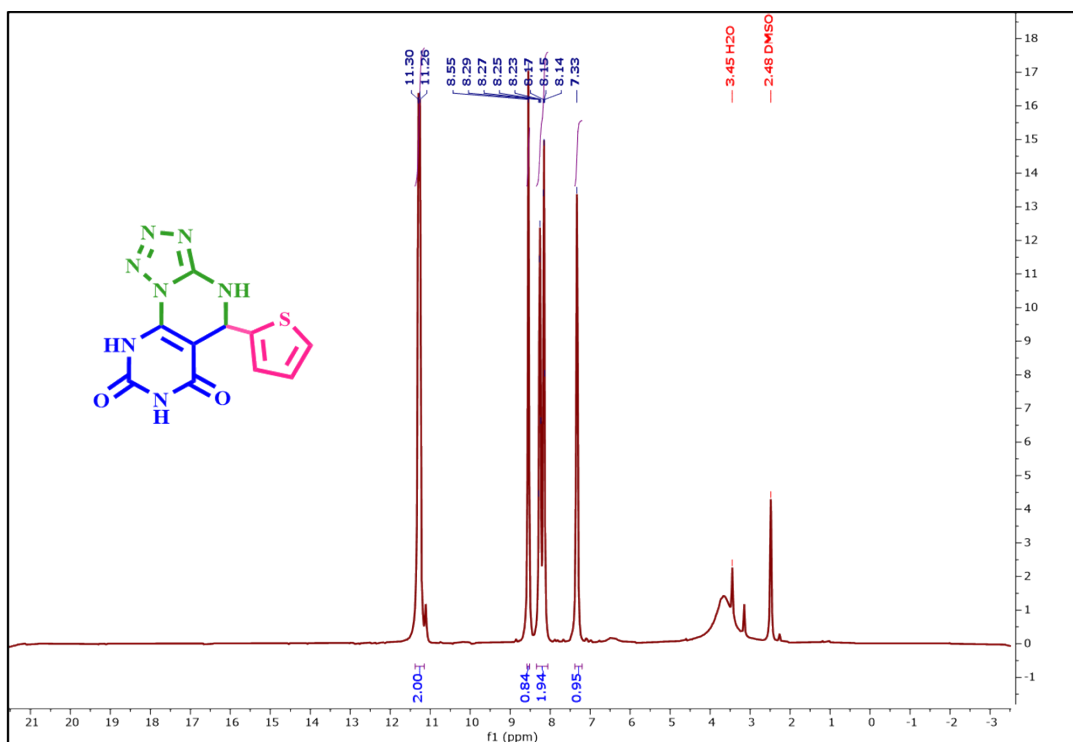

<sup>1</sup>H NMR Spectrum of 8a

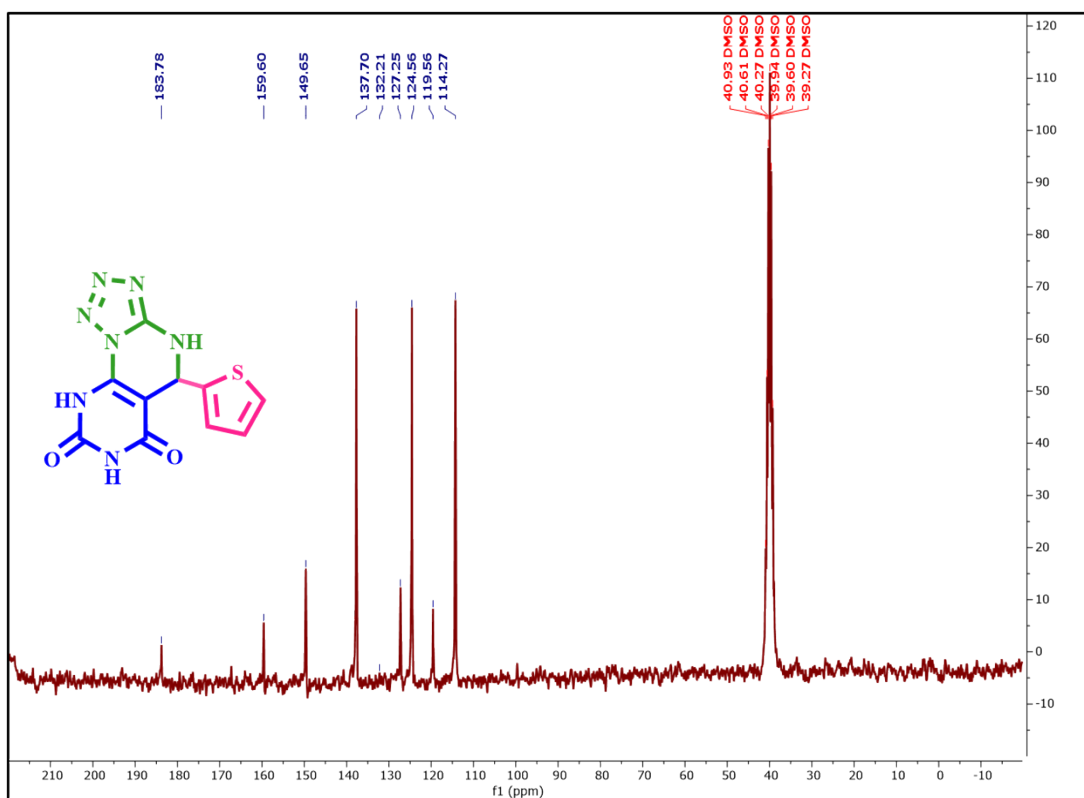

<sup>13</sup>C NMR Spectrum of 8a

8,8-dimethyl-5-phenyl-5,7,8,9-tetrahydro-1,2,4-triazolo[1,5-a]quinazolin-6(4H)-one (**9a**)

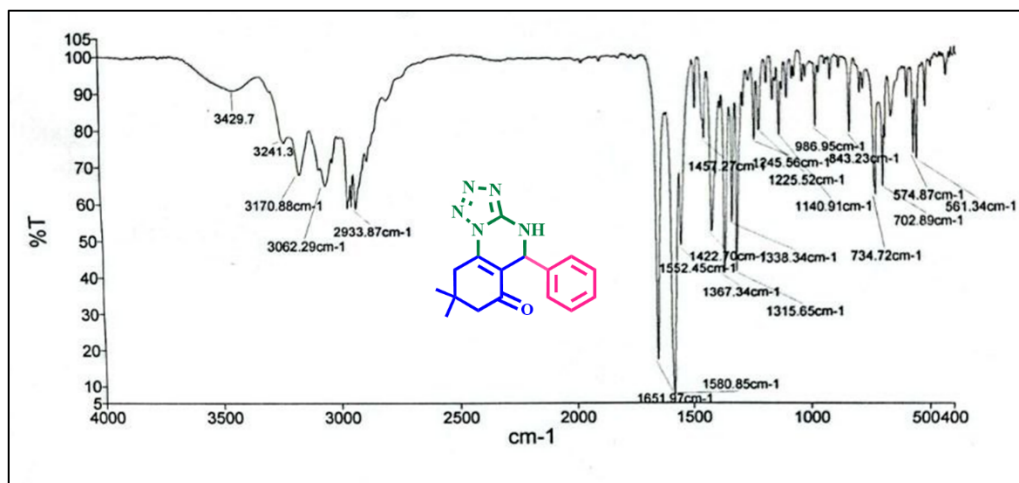

IR Spectrum of **9a**

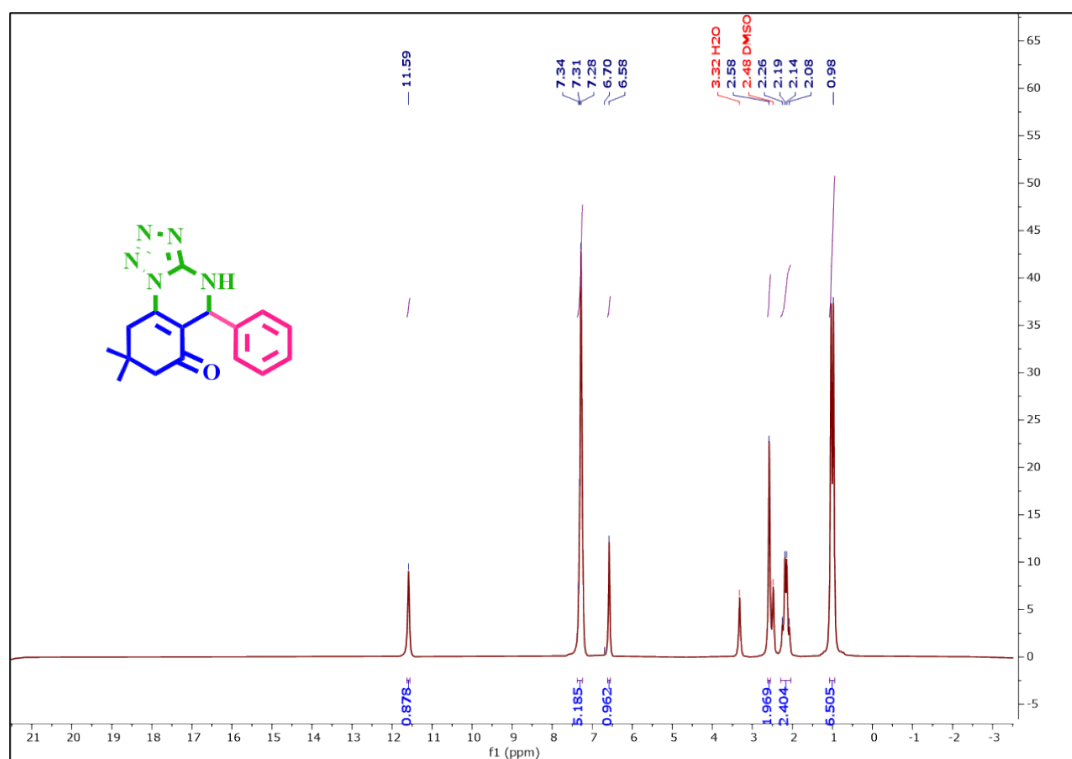

<sup>1</sup>H NMR Spectrum of **9a**

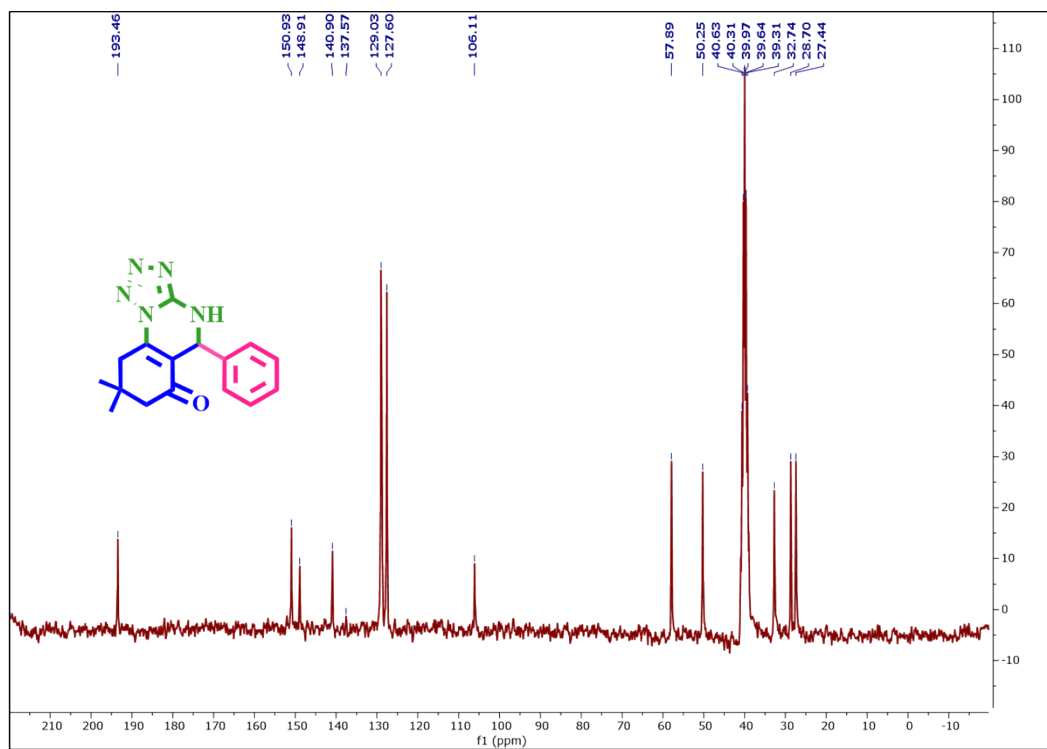

$^{13}\text{C}$ NMR Spectrum of 9a

5-(4-chlorophenyl)-8,8-dimethyl-5,7,8,9-tetrahydro-1H-tetrazolo[1,5-a]quinazolin-6-one  
(10a)

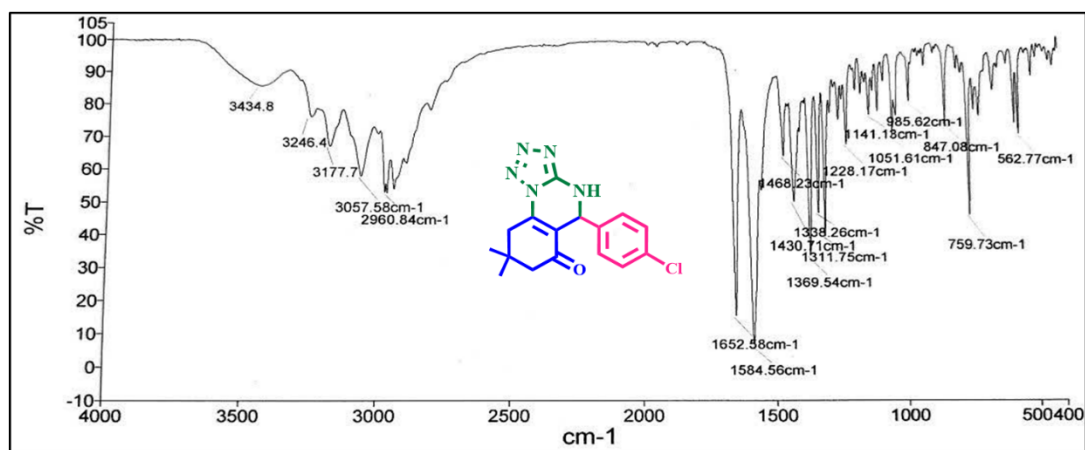

IR Spectrum of 10a

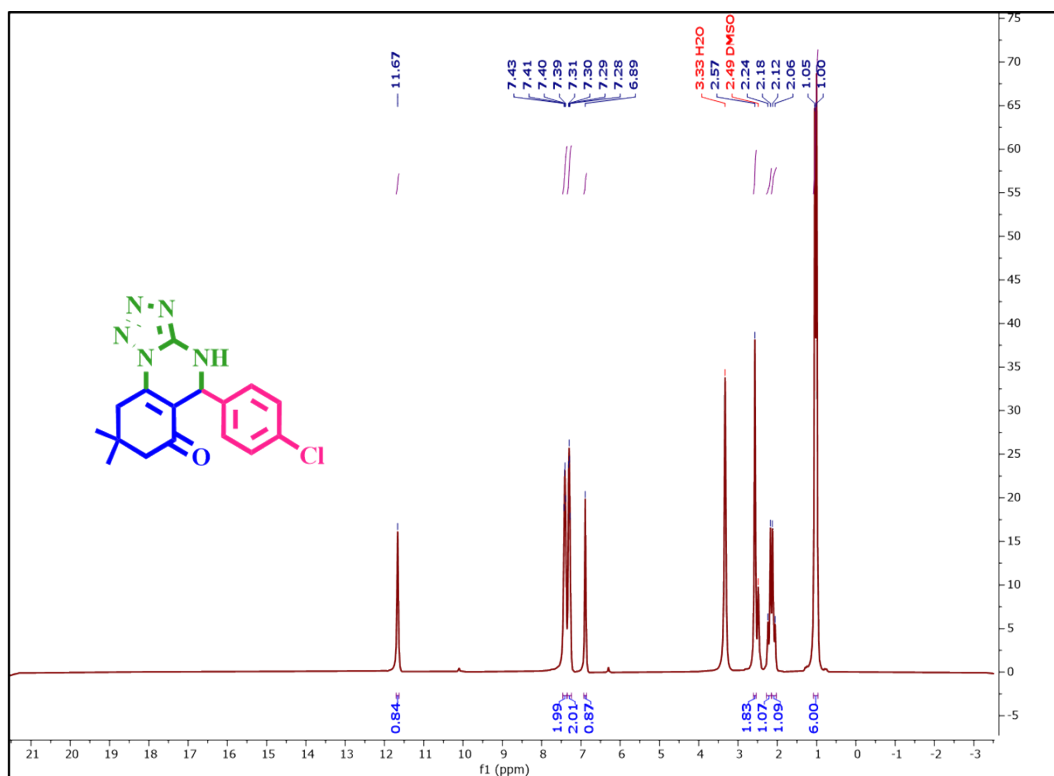

<sup>1</sup>H NMR Spectrum of 10a

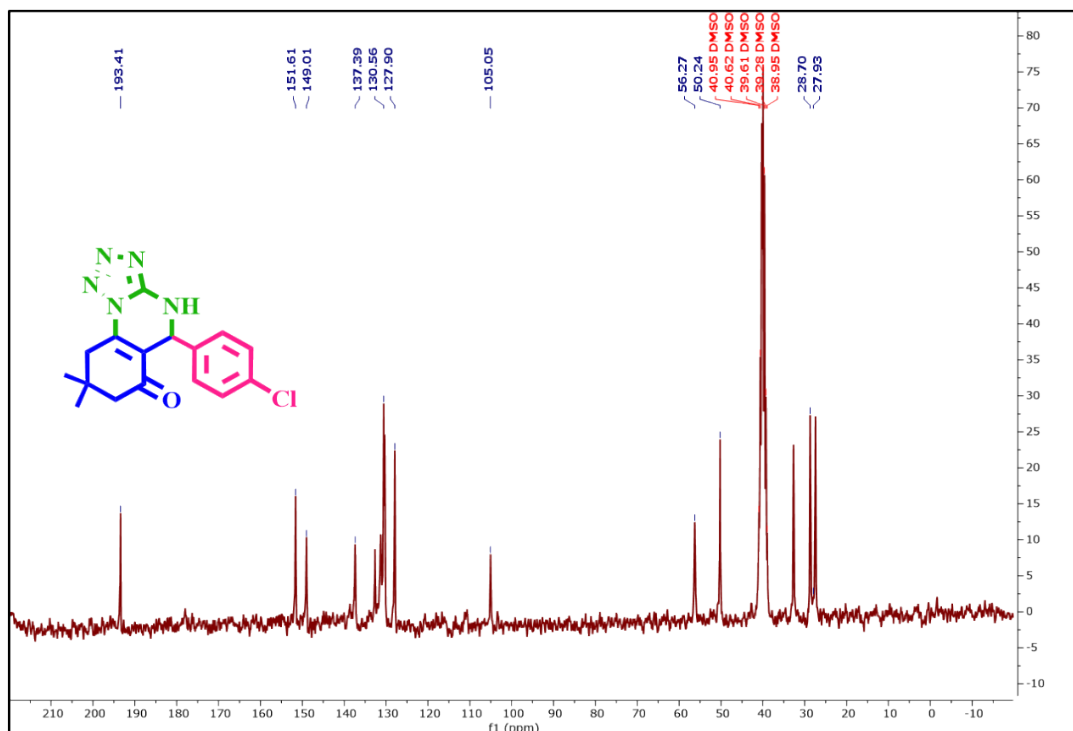

<sup>13</sup>C NMR Spectrum of 10a



5-(3-ethoxy-4-hydroxyphenyl)-8,8-dimethyl-5,7,8,9-tetrahydro-tetrazolo[1,5-*a*]quinazolin-6(4*H*)-one (**11a**)

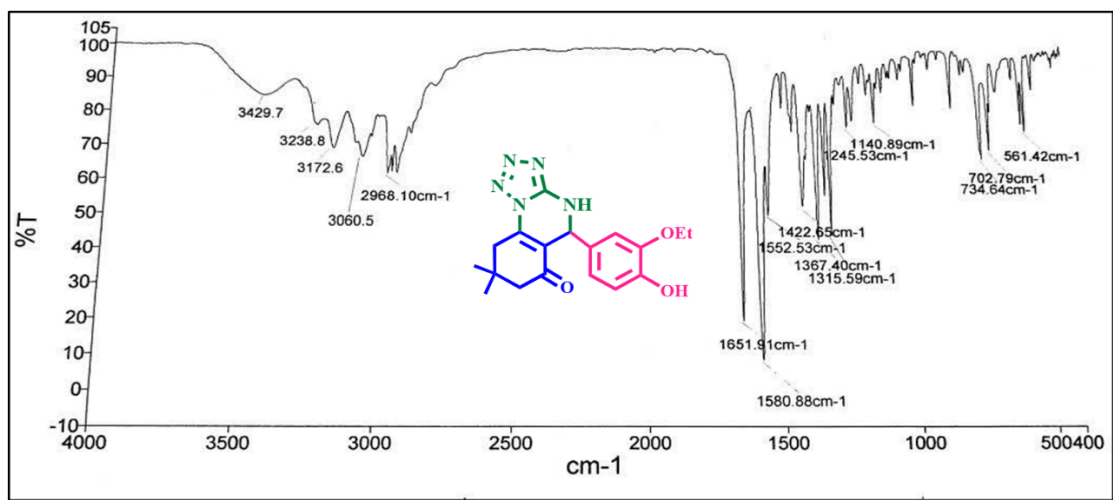

IR Spectrum of 11a

5-(2-chlorophenyl)-8,8-dimethyl-5,7,8,9-tetrahydro-tetrazolo[1,5-*a*]quinazolin-6(4*H*)-one (**12a**)

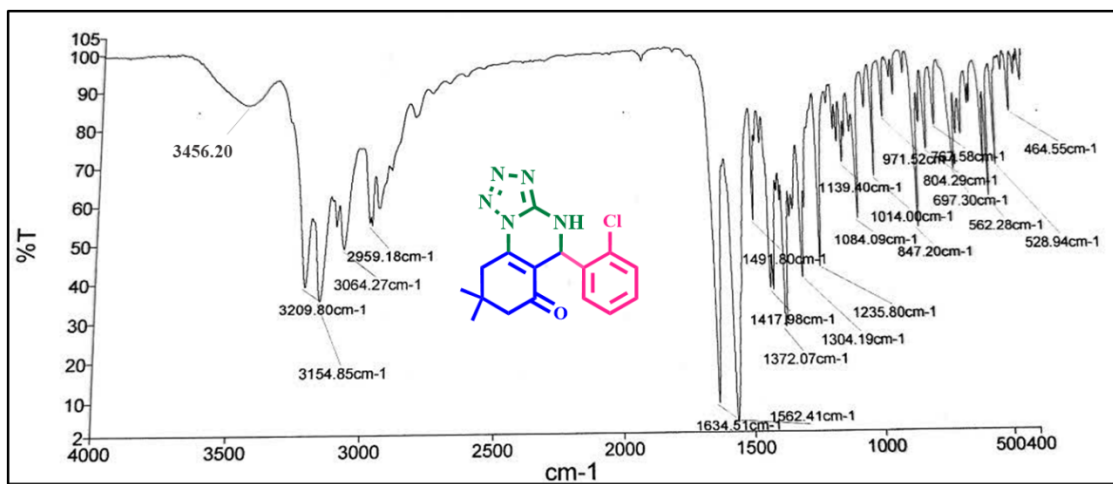

IR Spectrum of 12a
